# Supplementary material
Source: Preprints.org preprint supplement (doi:10.20944/preprints202008.0453.v2)
Supplement: Supplementary file 1 [file supplementary]

**Biological and cultural history of domesticated dogs in the Americas**

Valentina Segura 1, ORCID: 0000-0002-0307-4975

Email: [vseguragago@gmail.com](mailto:vseguragago@gmail.com)

Madeleine Geiger 2, ORCID: 0000-0002-8405-6663

Email: [madeleine.geiger@pim.uzh.ch](mailto:madeleine.geiger@pim.uzh.ch)

Tesla A. Monson 3

Email: [monsont2@wwu.edu](mailto:monsont2@wwu.edu)

David Flores 1, 4

Email: [davflor@gmail.com](mailto:davflor@gmail.com)

Marcelo R. Sánchez-Villagra 2 * ORCID: 0000-0001-7587-3648

Email: [m.sanchez@pim.uzh.ch](mailto:m.sanchez@pim.uzh.ch)

1 Unidad Ejecutora Lillo, Consejo Nacional de Investigaciones Científicas y Técnicas–Fundación Miguel Lillo, Tucumán, Argentina.

2 Palaeontological Institute and Museum, University of Zurich, Switzerland.

3Department of Anthropology, Western Washington University, Bellingham, Washington

4 Instituto de Vertebrados. Fundación Miguel Lillo. Tucumán, Argentina.

* Corresponding author

**Abstract**

Domestication had a dramatic influence on the cultural evolution of human histories, and on the biological evolution of domesticated species. Domestic dogs occurred earlier in the Americas than other domesticated animals. Older records in the continent come from North America, dated 11,000-8,400 ybp, and in the Andes from 5,600-5,000 ybp. In order to present an overview of human-dog interaction in the Americas, and to identify gaps in knowledge of this subject, we reviewed 178 publications on zooarchaeological record of burials, genetics, morphology, and ethnological information of American dogs, revisiting the history and interactions across the continent. There is no evidence of an in-situ dog initial domestication. Pre-Columbian diversity in North America includes at least three varieties, whereas in South America six varieties were documented. Historical descriptions of phenotypes (e.g. humped dog) may represent an expression associated with mutations. We find that archaeological, historical, and ethnographic records reveal non-traditional uses and hybridizations with other canids. For example, the Coast Salish people exploited woolly dogs for manufacturing blankets. Dog acquisition by some Amazonian cultures began towards the end of the nineteenth century. Overall more than 41 dog breeds originated in the Americas and are currently recognized by kennel clubs. The main gap in knowledge points to the relationships between American breeds, local hybridizations, migratory routes of dogs following Indigenous peoples’ social networks, historical-cultural contexts, and quantification of morphological diversity. North and Central American dogs have been more intensively studied than those from the Amazon regions or Patagonia. We find that the history of domestication in the Americas is far from simple and integrative studies are needed.

**Keywords**

Archaeology, Morphology, ancient DNA, feralisation, hybridization, breed, Salish dogs*, Canis,* skulls

**Running Head:** Dogs in the Americas

**Résumé**

La domestication a eu une influence considérable sur l'évolution culturelle de l'histoire humaine et sur l'évolution biologique des espèces domestiquées. Les chiens domestiques sont apparus plus tôt en Amérique que les autres animaux domestiqués. Les premières occurrences de chiens domestiques dans les Amériques comprennent des spécimens de sites nord-américains datant d’il y a 11000 à 8400 années et des Andes d’il y a 5600 à 5000 années. Afin de présenter une vue d'ensemble des interactions entre l'homme et le chien sur le continent américain et d'identifier les lacunes dans la connaissance de ce sujet, nous avons passé en revue 178 publications sur l'enregistrement zooarchéologique des sépultures, la génétique, la morphologie et les informations ethnologiques des chiens américains, en revisitant l'histoire et les interactions à travers le continent. Nos recherches montrent qu’il n'existe aucune preuve de domestication initiale du chien *in situ*. La diversité des races canines précolombiennes comprend au moins trois variétés en Amérique du Nord, alors que six variétés ont été documentées en Amérique du Sud. Les descriptions historiques des phénotypes, comme le chien bossu par exemple, pourraient être associées à des mutations génétiques. Les archives archéologiques, historiques et ethnographiques révèlent que les chiens étaient utilisés de façon non traditionnelle et hybridés avec d'autres canidés. Par exemple, les Premières nations Salish de la côte exploitaient les chiens dits laineux pour la fabrication de couvertures. L'acquisition de chiens par certaines cultures amazoniennes a commencé vers la fin du XIXe siècle. Au total, plus de 41 races de chiens domestiques sont originaires des Amériques et sont actuellement reconnues par les fédérations cynologiques. Cependant, nous avons constaté un manque de connaissances concernant les relations entre les races de chiens américaines, les hybridations locales, les routes migratoires des chiens suivant les réseaux sociaux des peuples indigènes, les contextes historico-culturels et la quantification de la diversité morphologique. Les chiens d'Amérique du Nord et centrale ont été plus étudiés que ceux des régions amazoniennes ou de Patagonie. Pour conclure, cette étude montre que l'histoire de la domestication dans les Amériques est loin d'être simple et que des approches intégratives permettaient de mieux comprendre ce sujet.

**Mots clés**

Archaeology, Morphology, ancient DNA, feralisation, hybridization, breed, Salish dogs*, Canis,* skulls

**INTRODUCTION**

Aside from the polar regions, the Americas were the last continents populated by humans, at least 15,000 years before present (ybp) (Moreno-Mayar *et al*. 2018). The human-animal interactions that occurred since then include domestication, an activity that has dramatically influenced human history and biological evolution. Only a few animals were and still are domesticated by Indigenous people in the Americas: among mammals, the llama (*Lama glama* Linneaus, 1758), alpaca (*Vicugna pacos* Molina, 1782), and the guinea pig or cui (*Cavia porcellus* Linneaus, 1758), all in the Andean region; among birds, the Muscovy duck (*Cairina moschata* Linneaus, 1758) in the Amazon region, and the turkey (*Meleagris gallopavo* Linneaus, 1758) in areas of what is today Mexico (Larson & Fuller 2014). One domesticated animal occurred much earlier in the Americas than the others: the dog (*Canis familiaris* Linneaus, 1758). It predates the multiple exchanges and introduction of other domesticates between the Americas and the rest of the world after the year 1492 (Leonard *et al*. 2002, Leathlobhair *et al*. 2018).

Here we review much of the literature that pertains to the tempo and mode of domestic dog evolution, and interactions with humans in the Americas, since their arrival in late Pleistocene or early Holocene times. We bring together contributions from different disciplines including zooarchaeology, ethnology, molecular biology and evolutionary morphology. We help identify open questions and knowledge gaps, and note how new methodological tools (Evin 2016, 2020, Sykes *et al*. 2019) and conceptual developments (Sykes 2014) being applied in Europe, Asia and Africa could help elucidate the patterns of dog domestication in the Americas.

**METHODS**

Our work included literature searches using online available information, mainly based on databases such as Google Scholar, Scopus, Scielo, PubMed, Latindex, Redalyc, DOAJ, Biodiversity Heritage library, Library Genesis, and Internet Archive. Our search strategy was carried out using the following terms: *dog domestication, American dog, dog history*, followed by selection of all publications on the topic restricted to the Americas, taking into account all languages. We reviewed 178 articles (i.e. 118 papers in scientific journals, 31 books, 22 book chapters, and 7 dissertation theses) focusing on topics developed in this report (general knowledge, antiquity of dogs in the Americas, morphology of American dogs, hybridization, and non-traditional uses of American dogs). The information compiled ranged from the years 1651 (See Hernández 1992) to 2021 (e.g. Perri *et al*.) and included archaeological, ethnological, and zoological publications. The bibliography included references that cannot be found easily in conventional searches to material published in traditional journals, and spanned from detailed chronicles and anecdotal experiences to information written exclusively about this topic. Many references of works in Spanish were obtained through personal contact from reliable sources not commonly available, helping thus to circumvent the biases resulting from standard searches that are formally correct but de facto potentially ignore relevant works (Nuñez & Amano 2021).

**RESULTS**

**Antiquity of dogs in the Americas**

The antiquity of *Canis familiaris* in the Americas is controversial (Larson *et al*. 2012, Perri *et al*. 2019). The more ancient records come from North America, dated to approximately 10,000 ybp (Rick *et al*. 2008, Barnosky *et al*. 2014). The earliest record in North America was originally in Jaguar Cave site (Idaho) dated 10,400 ybp (Lawrence 1968), although subsequent revisions placed it at 3,500 and 1,000 ybp (Gowlett *et al*. 1987). Genomic analyses were performed on a small bone fragment at Hinds Cave (Texas, Tito *et al*. 2011) that has been dated to around 9,200 ybp. Additional records of ancient dogs in North America come from Stilwell II (10,190-9,630 ybp, Illinois; Perri *et al*. 2019), Koster (10,130-9,700 cal bp, Illinois; Perri *et al*. 2019), Rodgers Shelter (c. 8,800 ybp, Missouri; McMillan 1970), Modoc Rock Shelter (c. 8,400 ybp, Illinois; Ahler 1993), and Dust Cave (c. 8,400 ybp, Alabama; Walker *et al*. 2005).

Identifying dog remains at archaeological sites is complex, as is discriminating between dogs and wolves (*Canis lupus* Linneaus, 1758), as incipient domesticated dogs were likely wolf-like (Nowak 2005, Larson *et al*. 2012). This matter is further complicated by the morphological plasticity of *Canis* (Drake *et al*. 2015, Janssens *et al*. 2016, Drake *et al*. 2017, Morey & Jeger 2017). A recent and comprehensive review of morphological and morphometric parameters that have been used to distinguish dogs from wolves (Janssens *et al*. 2019) found that recent large Pleistocene canids reported as Paleolithic dogs fit within the morphometric distribution of Pleistocene wolves. However, a recent reanalysis (Galeta *et al*. 2020) reinforces the evidence of the morphological differences of Paleolithic dogs (beyond the small sample size) with respect to Pleistocene or recent wolves and recent dogs, in agreement with previous hypotheses (e.g. Germonpré *et al*. 2018). Putative Paleolithic dogs show morphological uniformity based on a combination of a relatively shorter skull and a relatively wider palate and braincase, as a signal of incipient domestication. In fact, Bergström *et al*. (2020) demonstrated the presence of at least five ancestral lineages of dogs at 11,000 ybp, suggesting a deeper and older history of human-dog relationship than has been traditionally considered.

Often zooarchaeologists studying the Paleoindian Period in North America cannot determine the true status of canid remains based on the geographical or morphological records alone (Larson *et al*. 2012, Perri 2016, Perri *et al*. 2019). Some authors have argued for the possibility of an *in situ* domestication of wolves (e.g. Koop *et al*. 2000, Witt *et al*. 2015), but this is in disagreement with ancient DNA analyses (Vilà *et al*. 1997, Leonard *et al*. 2002, von Holdt *et al*. 2010, Freedman *et al*. 2014, Leathlobhair *et al*. 2018, Bergström *et al*. 2020, Sinding *et al.* 2020), which have suggested that dog domestication centers were restricted to Asia and Europe. Accordingly, domestic dogs are hypothesized to have colonized the Americas by accompanying humans that came over and rapidly dispersed into the continent from around 15,000 ybp onwards (Bergström *et al*. 2020, Perri *et al.* 2021). Although some archaeological dog specimens (from North America) show genetic markers of relatedness to North American wolves (Koop *et al*. 2000, Witt *et al*. 2015), Perri *et al*. (2019) considered this the result of post-domestication admixture of domestic dogs and wolves rather than North American wolf domestication.

Dogs appear south of the original wolf distribution in Eurasia and North America, recorded in most places where agriculture is documented (Larson *et al*. 2012, Bergström *et al.* 2020). This pattern was also consistent in the Neotropics, including Mexico (Coxcatlan Cave, 5,200 ybp; Flannery 1967) and southern South America (1,000 ybp; Prates *et al*. 2010), where dogs are contemporarily associated with a sedentary mode of life related to agriculture. However, recent evidence suggests that the depth of human-dog mutualism may decrease with the development of agriculture, because dogs tend to lose importance as hunting companions (Perri 2016, Morey & Jeger 2017, Chambers *et al*. 2020).

In South America, the archaeological record of dogs is relatively rich in the Andean region of Peru, Chile, and Ecuador, with records from as old as 5,600-5,000 ybp (Loma Alta, Ecuador; Rosamachay, Chile and Peru; Byrd 1976, Stahl 1984, Mac Neish & Vierra 1983). A 2,000 ybp record was reported for southern Brazil (Guedes Milheira *et al*. 2017). Farther south in South America records are scarce, but some are equally old to those mentioned above, although their pertinence to *Canis familiaris* is questioned. For instance, the sites of Arroyo Seco (Argentina, 12,300-8,400 ybp), Cueva Tixi (Argentina, 10,400-10,000 ybp), Fell’s Cave (Chile, 10,340-10,020 ybp), and Los Toldos (Argentina, 9,200-8,200 ybp), are among the most important “oldest dog” sites (Caviglia 1986, Caviglia *et al*. 1986, Clutton-Brock 1988, Gutiérrez & Martinez 2008). These reports suggest a long history of dogs in southern South America, but recovered fossils in Patagonia and a reanalysis of evidence suggest that these records may belong to *Dusicyon avus* (Oliver 1926) or extant canids such as *Lycalopex culpaeus* Molina, 1782 or *L. griseus* Gray, 1837 (Langguth 1975, Caviglia *et al*. 1986, Fidalgo *et al*. 1986, Mazzanti & Quintana 1997, Amorosi & Prevosti 2008). The apparent discrepancy in the age of the records is another factor that limits temporal accuracy. Dog acquisition in the Amazonian cultures is notably recent (end of nineteenth century; Koster 2009, Stahl 2014). However, groups on the margin of the rainforest possessed dogs before the Europeans arrived (Pohl 1985, Guedes Milheira *et al*. 2017). Infectious diseases may have constrained the spread of dogs into some Neotropical environments (e.g. Amazonian region; Mitchell 2017, Chambers *et al*. 2020). Because the ancestor (the wolf) is not a tropical animal, its descendants would not have adapted to tropical parasites (Mitchell 2017). Recent studies considering cultural contexts in human-dog co-evolution (e.g. Chambers *et al*. 2020) also point to significant ecological constraints in the degree of mutualism, as warm climate and pathogenic stress can negatively affect the coexistence via less mutual utility. On the other hand, Uhl *et al*. (2019) indicated that the flux of diseases is generally in the opposite direction, from domestic dogs to wild canids. DNA studies may address these ideas, as when tracing the origin of a contagious canine cancer transferring during mating that manifests as genital tumors. This cancer was originated by cells of a founder domestic dog in America that lived 8,225 years ago and leaves a minimal genetic legacy in modern dog populations (Leathlobhair *et al*. 2018).

**The morphological diversity of pre-Columbian American domestic dogs**

In North America, records show variation in shape and size (Allen 1920, Schwartz 1998, Ensminger 2017). The two oldest domestic dog specimens found in North America (i.e. Koster & Stiwell II sites) exhibit different sizes (Perri *et al*. 2019). In contrast, some studies have highlighted the small size variation in the oldest records from North America (Morey & Wiant 1992, Crockford 2005) and argued that significant variation in skull size and shape (e.g. brachycephalic dogs) was not apparent until after about 4,000 ybp (e.g. Haag 1948, Crockford 1997). Reportedly, there is little evidence to point to a deliberate selection of specific phenotypes, especially for small dogs (Crockford 2005). Manin and Lefèvre (2016) suggested that not all contemporary societies of central Mexico in Classic and the Conquest periods, 500-1800 ybp, were specialized in the breeding and production of domestic dogs. Skull shape and size diversity in pre-Columbian North American dogs includes Mexican varieties such as the *itzcuintle* (common dog), *xoloitzcuintle* (Mexican hairless dog), *techichi* or *tlalchichi* (“mat [floor] dog”), the short-nosed dog, and a hybrid between dog and wolf called “loberro” (Blanco Padilla *et al*. 1999, Valadez *et al*. 2000, 2001, Blick *et al*. 2016). The highly unusual Mexican “humped” dog (Hernández 1651, Fig. 1) has been dismissed as a caricature (Ueck 1961). However, there is the possibility that such form represents a phenotype associated with mutations in the myostatin gene, which leads to abnormally heavy muscling in homozygous whippet dogs (‘‘bully’’ whippets), mice, cattle, sheep, and humans. Such mutation was observed in selected racing breeds, being positively selected in some cases (Mosher *et al*. 2007).

In North America, four additional size and kind categories of domestic dogs have been recognized, including a large, wolf-like form found in North Dakota, a smaller, coyote-like form associated with some of the central Plains Indigenous groups, as well as both short-faced and long-faced ‘Pueblo’ dogs (Allen 1920, Olsen 1974). Variation in coat color was also present, as descriptions of both white and black dogs have been recounted in the Pacific Northwest (Crockford 1997, Barsh *et al*. 2002), and the ‘Basketmaker’ mummified dogs, dated to approximately 2,000 ybp, have a piebald black and white coat and a tawny coat (Guernsey & Kidder 1921, Wormington 1947, Olsen 1974, Crockford 1997, Fugate 2008).

Examples of skulls of pre-Columbian domestic dogs from South America are shown in Figs 2-4. Dog populations in South America were diverse in skull shape and size before Europeans arrived (Gallardo 1965, Allen 1920, Fernandez de Oviedo y Valdés 1944, Valadez *et al*. 2000, Valadez & Mendoza 2005, Acosta *et al*. 2011, Blick *et al*. 2016). Spanish chroniclers described many varieties of canids that could, however, have been tamed wild forms confused with domestic dogs (Stahl 2013, Segura & Sánchez-Villagra in review).

Peruvian dogs were diverse, including a “shepherd-like” dog, a “hairless dog” (Tschudi 1844-46), a “dachshund-like” dog, a “bulldog” type dog (Nehring 1884, Reiss & Stübel 1880-1887, Gilmore 1950, Gallardo 1965), a dog with a somewhat shortened snout (Noak 1916), and a medium-sized dog with a long snout (Wing 1989). As in Mexico, Peru also developed its own hairless dog; both are currently recognized by the International Kennel Club (Vásquez *et al*. 2016, Appendix 1). Although the European origin of the modern Mexican *xoloitzcuintle* and the Peruvian hairless dog due to post-contact interbreeding was suggested (Leathlobhair *et al*. 2018), the archaeological record, based on artistic depictions and abnormal tooth morphology of skulls, showed that there were hairless dogs in Peru prior to the European invasion (Tschudi 1844, Leicht 1960). Shared genetic markers among modern and archaeological specimens assigned to hairless dogs also suggest common ancestry (Manin *et al*. 2018).

The Inca chronicler (and draftsman) Guamán Poma de Ayala described several types of dogs in Peru, including long-snouted, brachycephalic, and hairless dogs (Mendoza & Valadez 2003). In other regions of South America, the chronicles and archaeological record recorded “large and small dogs like ours, that they much esteem” (Fernandez de Oviedo y Valdés 1944, on lower Paraná River), a medium-sized dog from the Southern Cone (Acosta *et al*. 2011), and “small dogs, raised in houses, which are mute and do not bark” (Fernandez de Oviedo y Valdés 1944, on La Plata River Basin). Columbus reported two types of dogs in the Caribbean: larger mastiff-type dogs, and smaller, terrier-type dogs (Blick *et al*. 2016), which were recorded in archaeological sites (Grouard *et al*. 2013). Dogs reported from the extreme south (Patagonia and Tierra del Fuego) were also diverse in size, appearance and uses (Allen 1920, Cooper 1946, Schwartz 1998).

**The morphological diversity of post-Columbian, American domestic dogs**

In the Americas, Kennel clubs have been established since the late nineteenth century (e.g., 1884 in the case of the USA American Kennel club, 1888 the Canadian one) and today, more than 41 domestic dog breeds that originated in the Americas are recognized (Appendix 1). These American dog breeds exhibit remarkable variation in terms of body size, head shapes, dentition, and fur quality, which is comparable to – and even exceeding – the variation seen in dog breeds worldwide (Fig. 5).

The short and dorsally rotated rostrum, which is typical of brachycephalic breeds, characterizes breeds of different origins and size, including the Boston Terrier and American Bulldog (Fig. 6), among others such as the Alapaha Blue Blood Bulldog. There are also dolichocephalic breeds (e.g., American Foxhound, Silken Windhound), which tend to have narrow and elongated snouts and more lateral orbits. American dog breeds vary greatly in body size, ranging from the massive Newfoundland dog to the world’s smallest breed, the Chihuahua (Figs 5-6). Moreover, there are several modern breeds of fully or partially hairless domestic dogs that originated in the Americas, which also exhibit reduced tooth number in dental formulae (e.g., Peruvian hairless dog and Mexican Xoloitzcuintle; Kupczik *et al*. 2017).

Hypotheses about the phylogenetic relationships between breeds have been generated from genomic data (Parker *et al*. 2017), with some modern American breeds considered as basal (e.g. Alaskan Malamute, American Eskimo). There is substantial zooarchaeological and molecular evidence suggesting that pre-Columbian dogs are mostly extinct (including hairless dogs), and that these were replaced by the various European dog lineages (Leonard *et al*. 2002, Castroviejo-Fisher *et al*. 2011, Larson *et al*. 2012, Thalmann *et al*. 2013, Leathlobhair *et al*. 2018, Manin *et al*. 2018). Other authors have found evidence for a pre-Columbian origin and no modern European influence on Arctic ancient breeds such as Inuit, Eskimo, and Greenland dogs (Ameen *et al*. 2019), as well as the Mexican Chihuahua, suggesting just a partial replacement by modern European dogs (e.g. Brown *et al*. 2013, van Asch *et al*. 2013).

Several endemic breeds from the Americas originate mainly from crossbreeding between breeds of mostly European lineages (e.g. Larson *et al*. 2012, Leathlobhair *et al*. 2018), not all of which are currently recognized by Kennel clubs. For instance, several old American breeds (e.g. Alaskan Malamute, Eskimo dog, Xoloitzcuintle, Peruvian hairless dog) are currently recognized by the International Canine Kennel Club, whereas the endemic and very old Carolina Dog (genetically distinctive, Oskarsson 2012, van Asch *et al*. 2013) is recognized only by the smaller United Kennel Club and partially by the American Kennel Club. Another example of post-Columbian dog phenotypes created in the Americas is the Ovejero Magallanico from southern Chile’s Magallanes and Antarctica Region (Barrios *et al*. 2016), which originates from European breeds such as the extinct British breed Old Welsh Grey, and several varieties of Collies (Fuenzalida 2006). The Ovejero Magallanico or "Patagonian Sheepdog” is still an unrecognized breed, and seems to have high morphostructural uniformity, sexual dimorphism, and a combination of its own phenotypic features (Barrios *et al*. 2016, 2019).

**Hybridization of domestic dogs with other canids**

Recent reports (e.g. Frantz *et al*. 2020; Sinding *et al*. 2020) highlighted the importance of the genetic introgression of wild populations of *Canis* (*latrans* and *lupus*) that did not participate in the initial domestication process. Several evidences on genetic introgression have argued for the existence of crossbreeding between domestic dogs and North American wolves or coyotes (*Canis latrans* Say, 1823) (e.g. Walker & Frison 1982, Lehman *et al*. 1991, Roy *et al.* 1996, Valadez *et al*. 2001, 2002a, b, Adams *et al*. 2003, Valadez *et al*. 2006), what could have been an old practice contributing genetic diversity to the lineages of pre and post-Columbian American dogs. New and more powerful molecular techniques currently available (Sykes *et al*. 2019, Frantz *et al.* 2020) could be used to test these hypotheses. The analysis of ancient DNA of Koster's dog, one of the oldest records in North America, revealed a strong affinity with coyotes, with which it may have been mixed (Perri *et al*. 2019). A recent dietary study based on isotopes (Monagle *et al*. 2018) demonstrated that coyotes may have had a special role for Arroyo Hondoans people, and the Ute people kept and tamed coyotes in the Great Basin (Stewart 1942). However, a recent report (Sinding *et al.* 2020) found no significant gene flow between modern and ancient American sled dogs and modern American–Arctic wolf populations, in comparison with the Eurasian wolf. Such results suggest that modern American wolves have not contributed to the sled dog gene pool at least for the last 9,500 years, and support that the lack of gene flow from modern American-Arctic wolves into sled dogs potentially implies selection against hybrids.

The chronicles are clear in referring to the admixture of dogs with wolves or foxes, ancestrally practiced by many Native American cultures (e.g. Latcham 1823, Allen 1920, Valadez *et al*. 2001, Stahl 2013). For instance, the chronicles of Rengger of his trip to Paraguay in the nineteenth century describe the Indigenous peoples’ customs of collecting *Lycalopex gymnocercus* Fisher, 1814 puppies, taming, keeping, and even interbreeding them with domestic dogs (Mivart 1890, Latcham 1823). The chronicles of Fernandez de Oviedo y Valdés (1944) also mentioned the taming and interbreeding of *Cerdocyon thous* Linneaus, 1766 with European domestic dogs, and perhaps with pre-Columbian American dogs. According to the chronicles compiled by Roth (1924) and Cabrera and Yepes (1960), the Makusi of Guiana kept foxes (*C. thous*) adopted from pups, which they presumably crossed with their domestic dogs in order to obtain better specimens for hunting. The Selk Fuegians also likely tamed specimens of *L. culpaeus* (Petrigh & Fugassa 2013) which were crossed with dogs in pre-Columbian times.

The viability of generations of hybrids of dogs with South American endemic canids has been questioned based on empirical (Gilmore 1950) and chromosomal (Wayne *et al*. 1987, Sillero-Zubiri *et al*. 2004, Vilà & Leonard 2012) data. Furthermore, on the basis of dental morphology, a sole ancestry of pre-Columbian domestic dogs from the wolf, but not the coyote, has been suggested (Ueck 1961). However, the gene pool available from *Canis* species from North America and Mesoamerica has been well exploited by the native peoples of these regions, and possibly also by Europeans. Records of possible hybrid dog-wolves on the Plains were reported from old burials (Walker & Frison 1982). The chronicles of Richardson on the Plains described by Young and Goldman (1944) detailed the similarities between domestic dogs and wolves, and argue that hybrids demonstrate more strength than ordinary dogs for hunting. All these noteworthy claims require testing with comparative anatomical comparisons and modern DNA and morphometric tools.

Heppenheimer *et al*. (2018) reported a genetic signal of the extinct red wolves (*Canis rufus* [Audubon](https://www.google.com/search?client=firefox-b-d&sxsrf=ALeKk02tn_6QiExo74FBXY30Bx10h_jY5w:1610652590520&q=Audubon&stick=H4sIAAAAAAAAAONgVuLSz9U3MCwxL8grW8TK7liaUpqUnwcAqQ6X3xgAAAA&sa=X&ved=2ahUKEwi_s468lJzuAhUlHrkGHaT0CJAQmxMoATATegQIHxAD) & Bachman, 1851) in a living wild population of *Canis familiaris* in Galveston, Texas. Monagle *et al*. (2018) studied the diet of several archaeological specimens in Arroyo Hondo Pueblo (Mexico) through isotopes, finding an overlap in the diet of domestic dogs and wild coyotes, what may have resulted from similarity in the contacts to human settlements. These facts could suggest integration of wild canids in human society and their domestic dogs and/or commensal behavior of wild coyotes.

In South America, large species such as the Culpeo (*Lycalopex culpaeus*) or the Maned Wolf (*Chrysocyon brachyurus* Illiger, 1815), the former more common in archaeological sites, could be confounded if the remains are scarce or fragmentary, but differences in skull morphology between those species and *Canis* exist (Prevosti 2010, Prevosti *et al*. 2015, Loponte & Acosta 2016). Beyond these observations, taphonomic processes can also lead to problematic recognition of a dog fossil record, particularly in humid areas.

**Dogs as a source of food**

Dogs domesticated by Indigenous people, much like the dogs of today, played a number of roles in pre-colonial American societies (e.g. Bozell 1988). As part of this practice, Indigenous people implemented a range of diverse strategies for domestication, culling populations, and caring for maternal health (e.g. Bozell 1988). The usage of dogs by Indigenous people is geographically and temporally variable, with dogs being used for hunting, transport, food, rituals, company, and defense (e.g. Winship 1904, Teit 1909, Allen 1920, Allison *et al*. 1982, Bozell 1988, Barsh *et al*. 2002, Cunningham-Smith & Emery 2020).

Even today, dogs are used as food in some regions of Asia, although this is not practiced in the Americas. In contrast, some past American cultures, such as Maya and Aztec, are associated with the earliest Mesoamerican remains of domestic dogs used as food (Wing 1978, Fritz 1994). There are several reports from European colonizers that document this practice, primarily in times of famine or as part of socio-cultural rituals (e.g., Catlin 1841, Allen 1920, Bozell 1988). It is also possible to reconstruct this behavior through the zooarchaeological records of middens, dumps for domestic waste, which include bones with cut marks suggesting butchery. In many cases, there was a heterogeneous use of the resource over time. For instance, Mayans living at Pasion River site (Guatemala) showed a strong temporal variation in the consumption of animals such as dogs, deer, and turtles in their dumps, eating more dogs during the Formative period than in the Classical period (Olsen 1972, Pohl 1990), perhaps because the practice of intensive agriculture increased in the latter stage (Schwartz 1998). Aztecs from the Tehuacán Valley (Mexico) also showed a change in the consumption of dog over time as related to changes in climate and population sizes (Flannery 1967). In fact, archaeological evidence from North American and Japanese dog burials suggests that the development of agriculture reduced dogs’ importance (Perri 2016, Morey & Jeger 2017, Chambers *et al*. 2020). For the Incans, eating a dog was considered unpleasant and a bad habit, moreover they prohibited the consumption by those living in the Empire (Weiss 1970). Consumption could have been triggered or practiced more frequently by the lack of sufficient food caused by an increase in local population sizes, or by environmental changes that forced the management of some species for their own benefit (Morey 1994).

In the case of Caribbean groups, and some cultures of southeastern USA (Florida), dog eating was a habit, although in some cases rarely practiced by all groups in stratified societies (Wing 1978, Clayton *et al*. 1993). In the west and northwest of North America, archaeological excavations have found cut marks suggestive of butchery on dog remains (e.g., in Alaska, McManus-Fry *et al*. 2018), and the consumption of dogs has been linked to religious rituals and festivities (Catlin 1841). Rituals of the Dog-Eaters, a ‘secret society’ of the Tsimshian of the Pacific Northwest, were associated with social distribution of wealth and selective breeding of village dogs (Boas & Tate 1916, Allison *et al*. 1982, Ruttle 2010, McAllister 2011). During the course of the ritual, dogs that had left the village and associated with wolves were killed, thereby selecting for more obedient village dogs (McAllister 2011). There are varying reports of dog flesh consumed during the ritual, but some accounts reported that as little flesh as possible was consumed, emphasizing that this was not a common food source (Frazer 1910).

In general, a pattern is observed where the habit of consuming dogs as a meat supplement was developed in agricultural cultures, and not so much in hunter-gatherer societies (Schwartz 1998). On the other hand, many hunter-gatherer peoples did strive to create breeds of certain domestic animals for defined purposes (e.g. for hunting or for use in making textiles, so not including the dog as a food source was a decision and not an accident) (Valadez & Mendoza 2005).

**Dogs for hunting, transportation, and herding**

According to ethnographic and historical records, hunting dogs were commonly utilized by many different peoples in the Americas, with variation in how the dogs were kept, used, and trained (Morey 2010). For example, the Klamath people of Oregon utilized dogs for hunting of small animals such as the beaver, whereas the Fuegian dogs of southern South America were commonly used by the Selk’nam people to hunt otter (Allen 1920). Other peoples commonly noted to have bred and trained domestic dogs for hunting include the Salish people of the Pacific Northwest, the Inuit people of the north, and the Hidatsa, among others (Teit 1909, Allen 1920, Wilson 1924, Barsh *et al*. 2002).

In addition to hunting, transportation was a task employed by dogs in the Americas. European colonizers wrote about the use of sled dogs, or *travois*, as early as the 1500’s in Mexico (Winship 1904, Allen 1920). The Pawnee people of eastern North America commonly used dogs as ‘beasts of burden’, pulling sleds, or sledges (Bozell 1988), as did the Hidatsa (Allen 1920, Wilson 1924). The Inuit, most widely associated with sled-dogs, used them to transport goods and people across the tundra (e.g., Laugrand & Oosten 2002, Ameen *et al*. 2019). As part of the forced suppression of Indigenous people during the twentieth century, many sled dogs were killed by the US government, leading to a heightened sense of responsibility and connection between these peoples and their dogs (Laugrand & Oosten 2002). In addition, sleds dogs were also used in the Arctic of western Alaska by peoples like the Yup’ik to transport umiak, or large skin boats, to fishing sites (McManus-Fry *et al*. 2018).

Herding dogs were much less common in pre-Columbian Americas, although they are documented starting with European colonization, particularly as herders of horses, for example among the Cherokee (Allen 1920). It has been widely reported that Indigenous people used dogs to herd animals such as llamas (Chiribaya culture, Peruvian coast), although the use of dogs for this purpose is questionable (Schwartz 1998, Wylde 2017). However, Inca Chronicler Guamán Poma de Ayala drew a young girl as herder with two llamas and a dog (Mendoza & Valadez 2003).

**Dogs for wool**

One use that was practiced by Indigenous peoples, which is absent from today’s culture, was the use of dogs in the textile industry for weaving and shearing. An entire textile industry for dog wool was developed by the Salish peoples. According to historical accounts and oral histories, the Salish peoples kept two types of domestic dog – one referred to as the ‘village dog’ and one referred to as the ‘woolly dog’ (Fig. 7; Howay 1918, Gleeson 1970, Gunther 1972, Crockford 1994, 1997, 2005, Crockford & Pye 1997, Barsh *et al*. 2002). The woolly dog is described as medium bodied, with thick matted hair and a curly tail, and has been repeatedly compared to the Spitz (found across Europe and Asia), and Japanese Shiba and Akita (Howay 1918, Keddie 1993). As early as Howay (1918), and consistent with our understanding of the peopling of the Americas today, the Salish woolly dogs have been used as evidence for a genetic relationship between Asian and American dogs (e.g., Koop *et al*. 2000), and Asian and American peoples (e.g., Hlusko *et al*. 2018).

However, researchers have not yet been able to determine the existence of a single lineage that characterizes and differentiates woolly dogs from other Coast Salish dogs (see Anza-Burgess *et al.* 2020). The Coast Salish First Nations exploited the thick fur of these dogs for manufacturing blankets (Howay 1918, Schulting 1994, Crockford & Pye 1997). Historical accounts report that the woolly dogs were kept separate from the village dogs and left to their own accord on small islands in the Salish sea with a large quantity of dried salmon to ensure that they would not starve, and then shorn short in the fall (Jenness 1934). Isotopic investigations of dog remain at archaeological sites in the Pacific Northwest demonstrate that, like many coastal Pacific Indigenous peoples, dogs in the archaeological record had a diet dominated by marine foods, particularly fish and shellfish (Cannon *et al*. 1999, Hofman & Rick 2014, Ames *et al*. 2015, West & France 2015, McManus-Fry *et al*. 2018).

The thick hair of the Salish woolly dogs was used extensively in the textile traditions of the Salish peoples, particularly in weaving (e.g., Schulting 1994, Tepper *et al*. 2017). Before the 1900s, blankets were an integral part of the currency of the Salish peoples, and Salish groups developed a unique weaving style and weaving technology that is prolific in the archaeological record (Wells 1969, Suttles 1983, Croes 2015, Barsh *et al*. 2002). Several Salish blankets have been identified in museum collections and sampled using proteomics with the results demonstrating that these blankets have significant amounts of dog hair in the weave (Solazzo *et al*. 2011). None of the blankets were made exclusively of dog hair – the textiles were made from interwoven dog hair and other fibers, particularly mountain goat hair which would have been a rare commodity in the coastal populations of the Salish Sea (e.g., Solazzo *et al*. 2011). With increasing numbers of colonial Europeans on the Pacific Coast, Salish blankets became devalued, and by all accounts, the woolly dog breed was completely lost by the mid-1800s (Barsh *et al*. 2002, Croes 2015, Anza-Burgess *et al.* 2020).

There are scattered reports of dogs for weaving and shearing recorded by Europeans among other cultures, including Indigenous peoples in New Mexico (1500s; Winship 1904) as well as peoples of the MacKenzie River in Canada and among the Chono of Chile (Allen 1920, Cooper 1946). Several authors (Cooper 1917, Samitier 1967, Urbina-Burgos 2007) reported that the Chono peoples, inhabitants of the southern tip of Patagonia in Tierra del Fuego, bred small woolly dogs that helped with the hunting of otters, whose fur was also used for making blankets. Although the Chono did not develop a refined technique for textile production and breeding of these varieties of dogs, they also used dog hair for textile making. In North America, the Zuni people (New Mexico) also bred varieties of long-haired dogs they used to make clothes, according to the chronicles of the Spaniard Francisco Vázquez de Coronado y Luján (Winship 1896, Schwartz 1998). This custom, although rare, seems to have been practiced by different cultures, although never with the sophistication employed by the Salish peoples (Amoss 1993, Crockford 2005).

**CONCLUSIONS**

Recent advances in isotope analysis techniques, analytical morphology, analysis of ancient DNA and other techniques, as well as the discovery of new archaeological sites related to dogs in the Americas, provided a great boost to the knowledge of the history of dogs on these continents. However, there are still many gaps in our knowledge. The historical relationships between breeds of American lineage (Parker *et al.* 2017), as well as the genetic contribution of wolves or other American wild canids to the domestic dogs are still much discussed, and the genetic relationships and morphological similarities of new specimens found in the archaeological record suggest alternative hypotheses of dispersion and crossing events with wolves. American dog populations today may or may not have a strong genetic component originating from pre-Hispanic dogs, as well as from wild canids from the genus *Canis*. Revisionary work based on ancient DNA, radiocarbon dating (Popovic *et al*. 2020, Frantz *et al*. 2020), and morphology (Manin & Evin 2020), is likely to contradict many previous attributions of materials to domestic dogs or claims of hybridizations with local canids. Even for well-known species such as the dog, many uncertainties remain regarding important topics, such as migratory routes of humans and dogs in the Americas, and dog dispersal following Indigenous peoples’ social networks, historical cultural contexts, local hybridizations, quantification of dog morphological diversity (past and present), and phylogenetic relationships of current American breeds. Perhaps comparative ethnological work can provide insights into the cultural evolution of dog domestication in the Americas.

It is necessary to address knowledge gaps in anatomical characters that contribute to differences between domestic dogs and wolves, mainly those specimens from times of incipient domestication (Janssens *et al*. 2016, 2019, Galeta *et al*. 2020). The knowledge of the variation of cranial and dental characters in wolves (Perri 2016) and basal breeds of domestic dogs (Geiger *et al*. 2017) is an aspect still under study. The morphological diversity of pre-Hispanic American varieties was never quantitatively examined in the context of the diversity of wolves and other American canids. A comprehensive study of variation of available skulls or their parts, and of dentitions, are needed, if possible using three-dimensional geometric morphometrics to best capture shape differences. This will identify the temporal and geographic patterns of change and make evident where the gaps of samples in the zooarchaeological record exist. An *in situ* domestication process in the Americas cannot be totally excluded, given the complex process of the dog's entry into the continent, but there is no evidence of this until now, nor of domestication of any other canid species (Segura & Sánchez-Villagra in review). Another challenging topic is to decipher the reasons why the Amazonian people did not possess dogs until (in the case of most groups) the 20th century, and to test if indeed that vast region never hosted domestic dogs before that time. The history of domestication in the Americas is far from simple, and integrative studies are needed. For example, isotopic work (carbon, nitrogen, and oxygen isotopes) has allowed researchers to trace trade routes, as with Mayan people bringing dogs to Ceibal from distant, highland regions (Sharpe *et al*. 2018). This study provided the earliest evidence for live-traded dogs and possible captive-reared specimens of wild taxa in the Americas, with possible ceremonial contexts suggesting that animal management and trade began in the Mayan area to promote special activities and played an important role in the symbolic development of political power. The topics addressed in this work were summarized for American dogs based on 178 scientific papers identified via literature search of databases and libraries. 41% of these focused exclusively on North American and Mesoamerican dogs, 26% on South American dogs, and the other 33% on general aspects of all American dogs, or dogs from the rest of the world. The existing bias in the studies carried out on dogs from North and Central America may reflect differences in research traditions and efforts in these regions and the older age of interaction and coexistence with humans in North America as compared to the Amazonian forest or southern Patagonia.

The access to collections and the integration of samples in studies of morphometrics and ancient DNA will be important to reconstruct the tempo and mode of domestic dog evolution in the continent, as in current studies being carried out primarily in Europe and Asia (Larson *et al*. 2012, Leathlobhair *et al*. 2018, Bergström *et al*. 2020).

**Acknowledgements**

We thank Chiara Barbieri and Rodolfo Salas for providing information; Courtney Paton, Sarah Campbell, members of the Lummi Nation, and the Archaeology Lab at Western Washington University for granting access to specimens of the Salish woolly dog. We thank all members of the Indigenous Nations of the Americas who have safeguarded these lands since time immemorial. We thank Christiane Funk at the Museum für Naturkunde Berlin, Stefan Hertwig at the Naturhistorisches Museum Bern, Renate Lücht at the Zoologisches Institut/Populationsgenetik, Christian-Albrechts-Universität zu Kiel, and Martina Schenkel at the Zoologisches Museum der Universität Zürich, for access to specimens; Judith Recht and Alexandra Wegmann for diverse editorial help, Anne-Claire Fabre for abstract translation; Greger Larson and Angela Perri for suggestions to earlier versions of the manuscript, Allowen Evin for access to an unpublished manuscript, Carly Ameen and an anonymous reviewer for their thorough reviews and useful suggestions, and the SNF Swiss National Science Foundation 31003A_169395 and Fundación Miguel Lillo (Project Z-0122-12) for support.

**References**

ACOSTA A., LOPONTE D. & GARCÍA ESPONDA C. 2011. — Primer registro de perro doméstico prehispánico (*Canis familiaris*) entre los grupos cazadores recolectores del humedal de Paraná inferior (Argentina). *Antípoda. Revista de Antropología y Arqueología* 13: 175-199.

ADAMS J. R., LEONARD J. A. & WAITS L. P. 2003. — Widespread occurrence of a domestic dog mitochondrial DNA haplotype in southeastern US coyotes. *Molecular Ecology* 12 (2): 541-546. https://doi.org/10.1046/j.1365-294X.2003.01708.x

AHLER S. R. 1993. — Stratigraphy and radiocarbon chronology of Modoc rock shelter, Illinois. *American Antiquity* 58 (3): 462-489. https://doi.org/10.2307/282107

ALLEN G. M. 1920. — Dogs of the American aborigines. *Bulletin of the Museum of Comparative Zoology* 73 (9): 433–517.

ALLISON M. J., FOCACCI G. & SANTORO C. 1982. — The pre‐Columbian dog from Arica, Chile. *American Journal of Physical Anthropology* 59 (3): 299-304. https://doi.org/10.1002/ajpa.1330590310

AMEEN C., FEUERBORN T. R., BROWN S. K., LINDERHOLM A., HULME-BEAMAN A., LEBRASSEUR O., SINDING M.-H. S., LOUNSBERRY Z. T., LIN A. T., APPELT M., BACHMANN L., BETTS M., BRITTON K., DARWENT J., DIETZ R., FREDHOLM M., GOPALAKRISHNAN S., GORIUNOVA O. I., GRØNNOW B., HAILE J., HALLSTEINN HALLSSON J., HARRISON R., HEIDE-JØRGENSEN M. P., KNECHT R., LOSEY R. J., MASSON-MACLEAN E., MCGOVERN T. H., MCMANUS-FRY E., MELDGAARD M., MIDTDAL Å., MOSS M. L., NIKITIN I. G., NOMOKONOVA T., HULDA PÁLSDÓTTIR A., PERRI A., POPOV A. N., RANKIN L., REUTHER J. D., SABLIN M., SCHMIDT A. L., SHIRAR S., SMIAROWSKI K., SONNE C., STINER M. C., VASYUKOV M., WEST C. F., WEEN G. B., WENNERBERG S. E., WIIG Ø., WOOLLETT J., DALÉN L., HANSEN A. J., GILBERT M. T. P., SACKS B. N., FRANTZ L., LARSON G., DOBNEY K., DARWENT C. M. & EVIN A. 2019. — Specialized sledge dogs accompanied Inuit dispersal across the North American Arctic. *Proceedings of the Royal Society B* 286 (1916): 20191929. https://doi.org/10.1098/rspb.2019.1929

AMES K. M., RICHARDS M. P., SPELLER C. F., YANG D. Y., LYMAN R. L. & BUTLER V. L. 2015. — Stable isotope and ancient DNA analysis of dog remains from Cathlapotle (45CL1), a contact-era site on the Lower Columbia River. *Journal of Archaeological Science* 57: 268-282. https://doi.org/10.1016/j.jas.2015.02.038

AMOROSI T. & PREVOSTI F. J. 2008. — A preliminary review of the canid remains from Junius Birds excavations at Fell’s and Pali Aike caves, Magallanes, Chile. *Current Research in the Pleistocene* 25: 25-27.

AMOSS P. T. 1993. — Hair of the dog: unraveling precontact Coast Salish social stratification, *in* MATTINA A. & MONTLER T. (eds), *American Indian Linguistics and Ethnography in Honor of Laurence C. Thompson.* University of Montana Missoula, Missoula: 3-35.

ANZA-BURGESS K., LEPOFSKY D & YANG D. 2020. — A Part of the People”: Human-Dog Relationships Among the Northern Coast Salish of SW British Columbia. Journal of Ethnobiology 40: 434-45. https://doi.org/10.2993/0278-0771-40.4.434

BARNOSKY A. D., HOLMES M., KIRCHHOLTES R., LINDSEY E., MAGUIRE K. C., POUST A. W., STEGNER M. A., SUNSERI J., SWARTZ B., SWIFT J., VILLAVICENCIO N. A. & WOGAN G. O. U. 2014. — Prelude to the Anthropocene: two new North American land mammal ages (NALMAs). *The Anthropocene Review* 1 (3): 225-242. https://doi.org/10.1177/2053019614547433

BARRIOS N., BÓRQUEZ A., GÓMEZ M., TAFRA V. & SPONENBERG P. 2016. — Estudio descriptivo del color de manto y señas del perro Ovejero Magallánico, Chile. *Archivos de Zootecnia* 65 (249): 99-101. <https://doi.org/10.21071/az.v65i249.447>

BARRIOS N., FUENZALIDA A., GÓMEZ M., HEUSER C., MUÑOZ R., OSTRANDER E. A., PARKER H. G., & GONZÁLEZ-LAGOS C. 2019 - The Patagonian Sheepdog: Historical Perspective on a Herding Dog in Chile. Diversity. 11 (12): 245. <https://doi.org/10.3390/d11120245>

BARSH R. L., JONES J. M. & SUTTLES W. 2002. — History, ethnography, and archaeology of the Coast Salish woolly-dog, *in* SNYDER L. M. & MOORE E. A. (eds), *Dogs and People in Social, Working, Economic or Symbolic Interaction.* Oxbow Books, Oxford: 1-11.

BERGSTRÖM A., FRANTZ L., SCHMIDT R., ERSMARK E., LEBRASSEUR O., GIRDLAND-FLINK L., LIN A. T., STORÅ J., SJÖGREN K. G., ANTHONY D., ANTIPINA E., AMIRI S., BAR-OZ G., BAZALIISKII VI., BULATOVIĆ J., BROWN D., CARMAGNINI A., DAVY T., FEDOROV S., FIORE I., FULTON D., GERMONPRÉ M., HAILE J., IRVING-PEASE E. K., JAMIESON A., JANSSENS L., KIRILLOVA I., HORWITZ L. K., KUZMANOVIC-CVETKOVIĆ J., KUZMIN Y., LOSEY R. J., DIZDAR D. L., MASHKOUR M., NOVAK M., ONAR V., ORTON D., PASARIĆ M., RADIVOJEVIĆ M., RAJKOVIĆ D., ROBERTS B., RYAN H., SABLIN M., SHIDLOVSKIY F., STOJANOVIĆ I., TAGLIACOZZO A., TRANTALIDOU K., ULLÉN I., VILLALUENGA A., WAPNISH P., DOBNEY K., GÖTHERSTRÖM A., LINDERHOLM A., DALÉN L., PINHASI R., LARSON G., & SKOGLUND P. 2020. — Origins and genetic legacy of prehistoric dogs. *Science* 370(6516): 557-564. <https://doi:10.1126/science.aba9572>

BLANCO PADILLA A., VALADEZ R. & RODRÍGUEZ B. 1999. — Colección arqueozoológica de perros del sitio Chac-Mool, Punta Pájaros, Quintana Roo. *Arqueología (segunda época)* 22: 89-106.

BLICK J. P., BANKSTON A., CAMPBELL C., JACKSON J., LASTING S., MIXON E. & SMITH L. 2016. — Dogs of the Bahamas and Caribbean: evidence from Columbus’s Diario, historical documents, and archaeology, *in* ERDMAN R. & MORRISON R., (eds), Proceedings of the Fifteenth Symposium on the Natural History of the Bahamas, San Salvador: 109-124.

BOAS F. & TATE H. W. 1916. — *Tsimshian Mythology.* Government Printing Office, Washington D.C., 1037 p.

BOZELL J. R. 1988. — Changes in the role of the dog in protohistoric-historic Pawnee culture. *Plains Anthropologist* 33 (119): 95-111. https://doi.org/10.1080/2052546.1988.11909431

BROWN S. K., DARWENT C. M. & SACKS B. N. 2013. — Ancient DNA evidence for genetic continuity in arctic dogs. *Journal of Archaeological Science* 40 (2): 1279-1288. https://doi.org/10.1016/j.jas.2012.09.010

BYRD K. M. 1976. — *Changing Animal Utilization Patterns and their Implications: Southwest Ecuador (6500 BC-AD 1400).* PhD dissertation, University of Florida, Gainesville.

CABRERA A. & YEPES J. 1960. — *Mamíferos Sud Americanos.* Ediar, Buenos Aires, 370 p.

CANNON A., SCHWARCZ H. P. & KNYF M. 1999. — Marine-based subsistence trends and the stable isotope analysis of dog bones from Namu, British Columbia. *Journal of Archaeological Science* 26 (4): 399-407.

CASTROVIEJO-FISHER S., SKOGLUND P., VALADEZ R., VILÀ C. & LEONARD J. A. 2011. — Vanishing native American dog lineages. *BMC Evolutionary Biology* 11 (1): 73.

CATLIN G. 1841. — *Letters and Notes on the Manners, Customs, and Condition of the North American Indians.* Wiley and Putnam, New York, 266 p.

CAVIGLIA S. E. 1986. — Nuevos restos de cánidos tempranos en sitios arqueológicos de Fuego-Patagonia. *Anales del Instituto de la Patagonia* 16: 85–93.

CAVIGLIA S. E., YACOBACCIO H. D. & BORRERO L. A. 1986. — Las Buitreras: convivencia del hombre con fauna extinta en Patagonia meridional, *in* BRYAN A. L. (ed), *New Evidence for the Pleistocene Peopling of the Americas.* University of Maine, Center for the Study of Early Man, Orono: 295-313.

CHAMBERS J., QUINLAN M. B., EVANS A. & QUINLAN R. J. 2020. — Dog-Human Coevolution: Cross-Cultural Analysis of Multiple Hypotheses. Journal of Ethnobiology 40:414-433. <https://doi.org/10.2993/0278-0771-40.4.414>

CLAYTON L. A., KNIGHT JR. V. J. & MOORE E. C. (eds) 1993. — *The De Soto Chronicles: The Expedition of Hernando de Soto to North America in 1539-1543.* University of Alabama Press, Tuscaloosa, 591 p.

CLUTTON-BROCK J. 1988. — The carnivore remains excavated at Fell’s Cave in 1970, *in* BIRD B., BIRD M., HYSLOP J. & WILLEY G. R. (eds), *Travels and Archaeology in South Chile.* University of Iowa Press, Iowa City: 188-195.

COOPER J. M. 1917. — *Analytical and Critical Bibliography of the tribes of Tierra del Fuego and Adjacent Territory.* Bureau of American Ethnology, Smithsonian Institution, Washington D.C., 233 p.

COOPER J. M. 1946. — The Chono, *in* STEWARD J. H. (ed), *Handbook of South American Indians: The Marginal Tribes.* Smithsonian Institution, Washington D.C.: 47–54.

CROCKFORD S. J. 1994. — Osteometric and ancient DNA analysis of prehistoric dogs of the central Northwest Coast: wool dog or bust! *Canadian Zooarchaeology* 5: 15-20.

CROCKFORD S. J. 1997. — *Osteometry of Makah and Coast Salish Dogs.* Archaeology Press, Simon Fraser University, Department of Archaeology, Burnaby, 148 p.

CROCKFORD S. J. 2005. — Native dog types in North America before arrival of European dogs, World Small Animal Veterinary Association World Congress Proceedings, 2005 Mexico City. The 30th Congress of the World Small Animal Veterinary Association Proceedings Online: https://www.vin.com/apputil/content/defaultadv1.aspx?pId=11196

CROCKFORD S. J. & PYE C. J. 1997. — Forensic reconstruction of prehistoric dogs from the Northwest Coast. *Canadian Journal of Archaeology*: 149-153.

CROES D. R. 2015. — The Salish Sea: using wet and dry site archaeology to explore the defining temporal characteristics of this inland sea. *Journal of Wetland Archaeology* 15 (1): 72-108

CUNNINGHAM-SMITH P. & EMERY K. 2020. — Dogs and People: Exploring the Human-Dog Connection. Journal of Ethnobiology 40: 409-413. <https://doi.org/10.2993/0278-0771-40.4.409>

DRAKE A. G., COQUERELLE M. & COLOMBEAU G. 2015. — 3D morphometric analysis of fossil canid skulls contradicts the suggested domestication of dogs during the late Paleolithic. *Scientific Reports* 5: 8299.

DRAKE A. G., COQUERELLE M., KOSINTSEV P. A., BACHURA O. P., SABLIN M., GUSEV A. V., FLEMING L. S. & LOSEY R. J. 2017. — Three-dimensional geometric morphometric analysis of fossil canid mandibles and skulls. *Scientific Reports* 7 (1): 9508.

ENSMINGER J. 2017. — *Dogs in California Aboriginal Cultures.* Land of Oaks Institute, Oakland, 160 p.

EVIN A., LEBRUN R., DUROCHER M., AMEEN C., LARSON G. & SYKES N. 2020. — Building three-dimensional models before destructive sampling of bioarchaeological remains: a comment to Pálsdóttir *et al.* (2019). *Royal Society Open Science* 7 (3): 192034. https://doi.org/10.1098/rsos.192034

EVIN A., SOUTER T., HULME-BEAMAN A., AMEEN C., ALLEN R., VIACAVA P., LARSON G., CUCCHI T. & DOBNEY K. 2016. — The use of close-range photogrammetry in zooarchaeology: creating accurate 3D models of wolf crania to study dog domestication. *Journal of Archaeological Science: Reports* 9: 87-93. https://doi.org/10.1016/j.jasrep.2016.06.028

FERNÁNDEZ DE OVIEDO Y VALDÉS G. 1944. — *Historia general y natural de las indias, Islas y tierra firme del mar océano.* Guarania, Asunción.

FIDALGO F., MEO GUZMÁN L. M., POLITIS G. G., SALEMME M. C., TONNI E. P., CARBONARI J. E., GOMEZ G. J., HUARTE R. & FIGINI A. J. 1986. — Investigaciones arqueológicas en el Sitio 2 de Arroyo Seco [Pdo. de Tres Arroyos, Pcia. de Buenos Aires, República Argentina], *in* BRYAN A. L. (ed), *New Evidence for the Pleistocene Peopling of Americas.* Center for the Study of Early Man, University of Maine, Orono: 221-270.

FLANNERY K. V. 1967. — Vertebrate fauna and hunting patterns, *in* BYERS D. S. (ed), *The Prehistory of the Tehuacan Valley.* University of Texas Press, Austin: 132-177

FRANTZ L. A. F., BRADLEY, D. G., LARSON, G. & ORLANDO, L. 2020. — Animal domestication in the era of ancient genomics. Nature Reviews Genetics 21: 449–460. <https://doi.org/10.1038/s41576-020-0225-0>

FRAZER J. G. 1910. — *Totemism and Exogamy: A Treatise on Certain Early Forms of Superstition and Society.* The MacMillan Company, New York, 583 p.

FREEDMAN A. H., GRONAU I., SCHWEIZER R. M., ORTEGA-DEL VECCHYO D., HAN E., SILVA P. M., GALAVERNI M., FAN Z., MARX P., LORENTE-GALDOS B., BEALE H., RAMIREZ O., HORMOZDIARI F., ALKAN C., VILÀ C., SQUIRE K., GEFFEN E., KUSAK J., BOYKO A. R., PARKER H. G., LEE C., TADIGOTLA V., SIEPEL A., BUSTAMANTE C. D., HARKINS T. T., NELSON S. F., OSTRANDER E. A., MARQUES-BONET T., WAYNE R. K. & NOVEMBRE J. 2014. — Genome sequencing highlights the dynamic early history of dogs. *PLoS Genetics* 10 (1): e1004016. https://doi.org/10.1371/journal.pgen.1004016

FRITZ G. J. 1994. — Are the first American farmers getting younger? *Current Anthropology* 35: 305-309.

FUENZALIDA Á. 2008. — *El perro Ovejero Magallánico; testimonio de reconstrucción histórica.* PhD dissertation, Pontificia Universidad Católica, Santiago.

FUGATE D. 2008. — Pueblo Dogs. *Archaeology Southwest* 22: 4–5.

GALETA P., LÁZNIČKOVÁ-GALETOVÁ, M., SABLIN, M., & GERMONPRÉ, M. 2020. — Morphological evidence for early dog domestication in the European Pleistocene: New evidence from a randomization approach to group differences. *The Anatomical Records* 2020: 1–21. <https://doi.org/10.1002/ar.24500>

GALLARDO G. 1964. — Perros americanos precolombinos. *Cuadernos del Instituto Nacional de Antropología y Pensamiento Latinoamericano* 5: 31-68.

GEIGER M., EVIN A., SÁNCHEZ-VILLAGRA M. R., GASCHO D., MAININI C. & ZOLLIKOFER C. P. 2017. — Neomorphosis and heterochrony of skull shape in dog domestication. *Scientific Reports* 7 (1): 13443. <https://doi.org/10.1038/s41598-017-12582-2>

GERMONPRÉ, M., LÁZNIČKOVÁ-GALETOVÁ, M., SABLIN, M. V., & BOCHERENS, H. — 2018. Self-domestication or human control? The upper Palaeolithic domestication of the wolf, *in* Stépanoff C. & Vigne J. D. (eds), *Hybrid communities: Biosocial approaches to domestication and other TRANS-species relationships.* New York: Routledge: pp. 39–64.

GILMORE R. M. 1950. — Fauna and ethnozoology of South America, *in* STEWARD J. H. (ed), *Handbook of South American Indians. Physical Anthropology, Linguistics and Cultural Geography of South American Indians.* United States Government Printing Office, Washington D.C.: 345-464.

GLEESON P. F. 1970. — *Dog Remains from the Ozette Village Archaeological Site.* MSc thesis, Department of Anthropology, Washington State University, Pullman.

GOWLETT J. A. J., HEDGES R. E. M., LAW I. A. & PERRY C. 1987. — Radiocarbon dates from the Oxford AMS system: Archaeometry datelist 5. *Archaeometry* 29 (1): 125-155.

GROUARD S., PERDIKARIS S. & DEBUE K. 2013. — Dog burials associated with human burials in the West Indies during the early pre-Columbian Ceramic Age (500 BC-600 AD). *Anthropozoologica* 48 (2): 447-465.

GUEDES MILHEIRA R., LOPONTE D. M., GARCÍA ESPONDA C., ACOSTA A. & ULGUIM P. 2017. — The First record of a pre‐Columbian domestic dog (*Canis lupus familiaris*) in Brazil. *International Journal of Osteoarchaeology* 27 (3): 488-494.

GUERNSEY S. J. & KIDDER A. V. 1921. — *Basket-Maker Caves of Northeastern Arizona: Report on the Explorations, 1916-17.* Peabody Museum of American Archaeology, Cambridge, 214 p.

GUNTHER E. 1972. — *Indian Life on the Northwest Coast of North America as seen by the Early Explorers and Fur Traders during the Last Decades of the Eighteenth Century.* University of Chicago Press, Chicago, 296 p.

GUTIÉRREZ M. A. & MARTÍNEZ G. A. 2008. — Trends in the faunal human exploitation during the Late Pleistocene and Early Holocene in the Pampean region (Argentina). *Quaternary International* 191 (1): 53-68.

HAAG W. G. 1948. — An osteometric analysis of some aboriginal dogs. *University of Kentucky Reports in Anthropology* 7 (3): 107-264.

HEPPENHEIMER E., BRZESKI K. E., WOOTEN R., WADDELL W., RUTLEDGE L. Y., CHAMBERLAIN M. J., STAHLER D. R., HINTON J. W. & VONHOLDT B. M. 2018. — Rediscovery of red wolf ghost alleles in a canid population along the American Gulf Coast. *Genes* 9 (12): 618.

HERNÁNDEZ F. 1992. — *Rerum medicarum Nouae Hispaniae thesaurus, seu Plantarum animalium mineralium Mexicanorum historia.* Voss, Berlin, 1092 p.

HLUSKO L. J., CARLSON J. P., CHAPLIN G., ELIAS S. A., HOFFECKER J. F., HUFFMAN M., JABLONSKI N. G., MONSON T. A., O’ROURKE D. H., PILLOUD M. A. & SCOTT G. R. 2018. — Environmental selection during the last ice age on the mother-to-infant transmission of vitamin D and fatty acids through breast milk. *PNAS* 115 (19): E4426-E4432.

HOFMAN C. & RICK T. 2014. — The dogs of CA-SRI-2: zooarchaeology, diet, and context of *Canis familiaris* from Santa Rosa Island, California, USA. *Ethnobiology Letters* 5: 65-76. https://doi.org/10.14237/ebl.5.2014.144

HOWAY F. W. 1918. — The dog's hair blankets of the Coast Salish. *The Washington Historical Quarterly* 9: 83-92.

JANSSENS L., PERRI A., CROMBÉ P., VAN DONGEN S. & LAWLER D. 2019. — An evaluation of classical morphologic and morphometric parameters reported to distinguish wolves and dogs. *Journal of Archaeological Science: Reports* 23: 501-533.

JANSSENS L., SPANOGHE I., MILLER R. & VAN DONGEN S. 2016. — Can orbital angle morphology distinguish dogs from wolves? *Zoomorphology* 135 (1): 149-158.

JENNESS D. 1974-35. — *The Saanich Indians of Vancouver Island.* Canadian Ethnology Service Archives, Canadian Museum of Civilization, Ottawa and Hull.

KEDDIE G. 1993. — Prehistoric dogs of BC: wolves in sheep's clothing. *The Midden* 25 (1): 3-5.

KOOP B. F., BURBIDGE M., BYUN A., RINK U. & CROCKFORD S. J. 2000. — Ancient DNA evidence of a separate origin for North American indigenous dogs. *BAR International Series* 889: 271-286.

KOSTER J. 2009. — Hunting dogs in the lowland Neotropics. *Journal of Anthropological Research* 65 (4): 575-610.

KUPCZIK K., CAGAN A., BRAUER S. & FISCHER M. S. 2017. — The dental phenotype of hairless dogs with FOXI3 haploinsufficiency. *Scientific Reports* 7 (1): 1-8.

LANGGUTH A. 1975. — Ecology and evolution in South American canids. , *in* FOX M. W. (ed), *The Wild Canids.* Van Nostrand Reinhold Co., New York: 192-206.

LARSON G. & FULLER D. Q. 2014. — The evolution of animal domestication. *Annual Review of Ecology, Evolution, and Systematics* 45: 115-136.

LARSON G., KARLSSON E. K., PERRI A., WEBSTER M. T., HO S. Y. W., PETERS J., STAHL P. W., PIPER P. J., LINGAAS F., FREDHOLM M., COMSTOCK K. E., MODIANO J. F., SCHELLING C., AGOULNIK A. I., LEEGWATER P. A., DOBNEY K., VIGNE J.-D., VILÀ C., ANDERSSON L. & LINDBLAD-TOH K. 2012. — Rethinking dog domestication by integrating genetics, archeology, and biogeography. *Proceedings of the National Academy of Sciences* 109 (23): 8878-8883. https://doi.org/10.1073/pnas.1203005109

LATCHAM R. E. 1823. — *Los animales domésticos de la América precolombiana.* Imprenta Cervantes, Santiago, 199 p.

LAUGRAND F. & OOSTEN J. 2002. — Canicide and healing. The position of the dog in the Inuit cultures of the Canadian Arctic. *Anthropos*: 89-105.

LAWRENCE B. 1968. — Antiquity of large dogs in North America. *Tebiwa* 11 (2): 43-49.

LEATHLOBHAIR M. N., PERRI A. R., IRVING-PEASE E. K., WITT K. E., LINDERHOLM A., HAILE J., LEBRASSEUR O., AMEEN C., BLICK J., BOYKO A. R., BRACE S., NUNES CORTES Y., CROCKFORD S. J., DEVAULT A., DIMOPOULOS E. A., ELDRIDGE M., ENK J., GOPALAKRISHNAN S., GORI K., GRIMES V., GUIRY E., HANSEN A. J., HULME-BEAMAN A., JOHNSON J., KITCHEN A., KASPAROV A. K., KWON Y.-M., NIKOLSKIY P. A., PERAZA LOPE C., MANIN A., MARTIN T., MEYER M., NOACK MYERS K., OMURA M., ROUILLARD J.-M., PAVLOVA E. Y., SCIULLI P., SINDING M.-H. S., STRAKOVA A., IVANOVA V. V., WIDGA C., WILLERSLEV E., PITULKO V. V., BARNES I., GILBERT M. T. P., DOBNEY K. M., MALHI R. S., MURCHISON E. P., LARSON G. & FRANTZ L. A. F. 2018. — The evolutionary history of dogs in the Americas. *Science* 361 (6397): 81-85. https://doi.org/10.1126/science.aao4776

LEHMAN N., EISENHAWER A., HANSEN K., MECH L. D., PETERSON R. O., GOGAN P. J. & WAYNE R. K. 1991. — Introgression of coyote mitochondrial DNA into sympatric North American gray wolf populations. *Evolution* 45 (1): 104-119.

LEICHT H. 1960. — *Pre-Inca Art and Culture.* Macgibbon & Kee, London, 253 p.

LEONARD J. A., WAYNE R. K., WHEELER J., VALADEZ R., GUILLÉN S. & VILA C. 2002. — Ancient DNA evidence for Old World origin of New World dogs. *Science* 298 (5598): 1613-1616.

LOPONTE D. & ACOSTA A. 2016. — Nuevos registros prehispánicos de *Canis familiaris* (Carnivora, Canidae) en la cuenca del Paraná, Argentina. *Mastozoología Neotropical* 23 (2): 431-454.

LORD K., SCHNEIDER R. A. & COPPINGER R. 2016. — Evolution of working dogs, *in* SERPELL J. (ed), *The Domestic Dog: Its Evolution, Behavior and Interactions with People.* 2nd ed. Cambridge University Press, Cambridge: 42-66.

MACNEISH R. S. & VIERRA R. K. 1983. — The preceramic way of life in the thorn forest riverine ecozone. *Prehistory of the Ayacucho Basin, Peru* 4: 48-129.

MANIN A. & EVIN A. 2020. — *Canis spp.* identification in central Mexico and its archaeological implications: toward a better understanding of the ecology and the cultural role of canids in ancient Mesoamerica. In: Boudadi-Maligne M, Mallye J-B (eds) Relations hommes – canidés de la préhistoire aux périodes modernes. Ausonius éditions, Bordeaux, pp 94-114

MANIN A. & LEFÈVRE C. 2016. — The use of animals in Northern Mesoamerica, between the Classic and the Conquest (200-1521 AD). An attempt at regional synthesis on central Mexico. *Anthropozoologica* 51 (2): 127-147.

MANIN A., OLLIVIER M., BASTIAN F., ZAZZO A., TOMBRET O., MANRIQUE J. C. E. & LEFÈVRE C. 2018. — Can we identify the Mexican hairless dog in the archaeological record? Morphological and genetic insights from Tizayuca, Basin of Mexico. *Journal of Archaeological Science* 98: 128-136.

MAZZANTI D. L. & QUINTANA C. A. 1997. — Asociación cultural de fauna extinguida en el sitio arqueológico Cueva Tixi, Provincia de Buenos Aires, Argentina. *Revista Española de Antropología Americana* 27: 11-22.

MCALLISTER I. 2011. — *Following the Last Wild Wolves.* Greystone Books Ltd, Vancouver, 183 p.

MCMANUS-FRY E., KNECHT R., DOBNEY K., RICHARDS M. P. & BRITTON K. 2018. — Dog-human dietary relationships in Yup'ik western Alaska: the stable isotope and zooarchaeological evidence from pre-contact Nunalleq. *Journal of Archaeological Science: Reports* 17: 964-972.

MCMILLAN R. B. 1970. — Early canid burial from the western Ozark highland. *Science* 167 (3922): 1246-1247.

MENDOZA ESPAÑA V. & VALADEZ AZÚA R. 2003. — Los perros de Guamán Poma de Ayala: visión actual del estudio del perro precolombino sudamericano. *AMMVEPE* 14 (2): 43-52.

MITCHELL P. 2017. — Disease: a hitherto unexplored constraint on the spread of dogs (*Canis lupus familiaris*) in Pre-Columbian South America. *Journal of World Prehistory* 30 (4): 301-349.

MIVART S. G. 1890. — *Dogs, Jackals, Wolves and Foxes.* RH Porter, London, 216 p.

MONAGLE V., CONRAD C. & JONES E. L. 2018. — What makes a dog? Stable isotope analysis and human-canid relationships at Arroyo Hondo Pueblo. *Open Quaternary* 4 (1): 6. https://doi.org/10.5334/oq.43

MONTGOMERY J. A. 1979. — *Prehistoric Subsistence at Semiahmoo Spit 45 WH 17.* MSc thesis, Western Washington University, Bellingham.

MORENO-MAYAR J. V., VINNER L., DE BARROS DAMGAARD P., DE LA FUENTE C., CHAN J., SPENCE J. P., ALLENTOFT M. E., VIMALA T., RACIMO F., PINOTTI T., RASMUSSEN S., MARGARYAN A., ORBEGOZO M. I., MYLOPOTAMITAKI D., WOOLLER M., BATAILLE C., BECERRA-VALDIVIA L., CHIVALL D., COMESKEY D., DEVIÈSE T., GRAYSON D. K., GEORGE L., HARRY H., ALEXANDERSEN V., PRIMEAU C., ERLANDSON J., RODRIGUES-CARVALHO C., REIS S., BASTOS M. Q. R., CYBULSKI J., VULLO C., MORELLO F., VILAR M., WELLS S., GREGERSEN K., HANSEN K. L., LYNNERUP N., MIRAZÓN LAHR M., KJÆR K., STRAUSS A., ALFONSO-DURRUTY M., SALAS A., SCHROEDER H., HIGHAM T., MALHI R. S., RASIC J. T., SOUZA L., SANTOS F. R., MALASPINAS A.-S., SIKORA M., NIELSEN R., SONG Y. S., MELTZER D. J. & WILLERSLEV E. 2018. — Early human dispersals within the Americas. *Science* 362 (6419): eaav2621. https://doi.org/10.1126/science.aav2621

MOREY D. F. 1994. — The early evolution of the domestic dog. *American Scientist* 82 (4): 336-347.

MOREY D. F. 2010. — *Dogs: Domestication and the Development of a Social Bond.* Cambridge University Press, Cambridge, 380 p.

MOREY D. F. & JEGER R. 2017. — From wolf to dog: Late Pleistocene ecological dynamics, altered trophic strategies, and shifting human perceptions. *Historical Biology* 29 (7): 895-903. https://doi.org/10.1080/08912963.2016.1262854

MOREY D. F. & WIANT M. D. 1992. — Early Holocene domestic dog burials from the North American Midwest. *Current Anthropology* 33 (2): 224-229.

MOSHER D. S., QUIGNON P., BUSTAMANTE C. D., SUTTER N. B., MELLERSH C. S., PARKER H. G. & OSTRANDER E. A. 2007. — A mutation in the myostatin gene increases muscle mass and enhances racing performance in heterozygote dogs. *PLoS Genetics* 3 (5): e79.

NEHRING A. 1884. — Über Rassebildung bei den Incahunden aus den Gräbern von Ancon. *Kosmos* 2: 94-111.

NOWAK R. M. 2005. — *Walker's Carnivores of the World.* JHU Press, Baltimore, 313 p.

NUÑEZ, M.A., AMANO, T. 2021 - Monolingual searches can limit and bias results in global literature reviews. *Nature Ecology and Evolution* doi.org/10.1038/s41559-020-01369-w).

OLSEN S. J. 1972. — Animal remains from Altar de Sacrificios. The Artifacts of Altar de Sacrificios*. Memoirs of the Peabody Museum of Archaeology and Ethnology* 14 (1-3): 172-176.

OLSEN S. J. 1974. — Early domestic dogs in North America and their origins. *Journal of Field Archaeology* 1 (3-4): 343-345.

OSKARSSON M. 2012. — *Analysis of the Origin and Spread of the Domestic Dog Using Y-chromosome DNA and mtDNA Sequence Data.* PhD dissertation, KTH Royal Institute of Technology, Stockholm.

PARKER H. G., DREGER D. L., RIMBAULT M., DAVIS B. W., MULLEN A. B., CARPINTERO-RAMIREZ G. & OSTRANDER E. A. 2017. — Genomic analyses reveal the influence of geographic origin, migration, and hybridization on modern dog breed development. *Cell Reports* 19 (4): 697-708.

PERRI A. 2016. — A wolf in dog's clothing: initial dog domestication and Pleistocene wolf variation. *Journal of Archaeological Science* 68: 1-4. https://doi.org/10.1016/j.jas.2016.02.003

PERRI A., WIDGA C., LAWLER D., MARTIN T., LOEBEL T., FARNSWORTH K., KOHN L. & BUENGER B. 2019. — New evidence of the earliest domestic dogs in the Americas. *American Antiquity* 84 (1): 68-87.

Perri A. R., Feuerborn T. R., Frantz L. A., Larson G., Malhi R. S., Meltzer D. J., & Witt, K. E. 2021 — Dog domestication and the dual dispersal of people and dogs into the Americas. *Proceedings of the National Academy of Sciences*, 118: e2010083118

PETRIGH R. S. & FUGASSA M. H. 2013. — Molecular identification of a Fuegian dog belonging to the Fagnano Regional Museum ethnographic collection, Tierra del Fuego. *Quaternary International* 317: 14-18.

POHL M. 1985. — The privileges of Maya elites: prehistoric vertebrate fauna from Seibal, *in* POHL M. (ed), *Prehistoric Lowland Maya Environment and Subsistence Economy.* Harvard University, Cambridge: 133-145.

POHL M. D. 1990. — The ethnozoology of the Maya: faunal remains from five sites in the Petén, Guatemala, *in* WILLEY G. R. (ed), *Excavations at Seibal, Guatemala. Peabody Museum Memoirs, Vol. 18, No. 3.* Harvard University, Cambridge: 144-174.

POPOVIĆ D., MENDOZA ESPAÑA V., ZIÓŁKOWSKI M., WEGLENSKI P. & BACA M. 2020. — Molecular species assignment and dating of putative pre-Columbian dog remains excavated from Bolivia. *Journal of Archaeological Science: Reports* 31: 102273.

PRATES L., PREVOSTI F. J. & BERÓN M. 2010. — First records of prehispanic dogs in southern South America (Pampa-Patagonia, Argentina). *Current Anthropology* 51 (2): 273-280.

PREVOSTI F. J. 2010. — Phylogeny of the large extinct South American canids (Mammalia, Carnivora, Canidae) using a “total evidence” approach. *Cladistics* 26 (5): 456-481.

PREVOSTI F. J., RAMÍREZ M. A., SCHIAFFINI M., MARTIN F., UDRIZAR SAUTHIER D. E., CARRERA M., SILLERO-ZUBIRI C. & PARDIÑAS U. F. 2015. — Extinctions in near time: new radiocarbon dates point to a very recent disappearance of the South American fox *Dusicyon avus* (Carnivora: Canidae). *Biological Journal of the Linnean Society* 116 (3): 704-720.

REISS W. & STÜBEL A. 1880. — *Das Totenfeld von Ancon in Peru.* Verlag von A. Asher & Co., Berlin.

RICK T. C., WALKER P. L., WILLIS L. M., NOAH A. C., ERLANDSON J. M., VELLANOWETH R. L., BRAJE T. J. & KENNETT D. J. 2008. — Dogs, humans and island ecosystems: the distribution, antiquity and ecology of domestic dogs (*Canis familiaris*) on California's Channel Islands, USA. *The Holocene* 18 (7): 1077-1087. https://doi.org/10.1177/0959683608095579

ROTH W. E. 1924. — *An Introductory Study of the Arts, Crafts, and Customs of the Guiana Indians. Thirty Eighth Annual Report of the Bureau of American Ethnology, 1916-17.* US Government Printing Office, Washington D.C.

ROY M. S., GEFFEN E., SMITH D. & WAYNE R. K. 1996. — Molecular genetics of pre‐1940 red wolves. *Conservation Biology* 10 (5): 1413-1424.

RUTTLE A. 2010. — Neither seen nor heard: looking for children in Northwest Coast archaeology. *Canadian Journal of Archaeology* 34 (1): 64-88.

SAMITIER L. 1967. — El grupo Chono o Wayteka y los demás pueblos Fuego-Patagonia. *RUNA, Archivo Para Las Ciencias Del Hombre* 10 (1-2): 123-194.

SCHULTING R. 1994. — The hair of the dog: the identification of a Coast Salish dog-hair blanket from Yale, British Columbia. *Canadian Journal of Archaeology* 18: 57-76.

SCHWARTZ M. 1998. — *A History of Dogs in the Early Americas.* Yale University Press, London, 260 p.

SEGURA V. & SÁNCHEZ-VILLAGRA M. R. In review. — Human-canid relationship in the Americas: an examination of canid biological attributes and domestication. In review in Mammalian Biology.

SHARPE A. E., EMERY K. F., INOMATA T., TRIADAN D., KAMENOV G. D. & KRIGBAUM J. 2018. — Earliest isotopic evidence in the Maya region for animal management and long-distance trade at the site of Ceibal, Guatemala. *PNAS* 115 (14): 3605-3610. https://doi.org/10.1073/pnas.1713880115

SILLERO-ZUBIRI C., HOFFMANN M. & MACDONALD D. W. (eds) 2004. — *Canids: Foxes, Wolves, Jackals and Dogs. Status Survey and Conservation Action Plan.* IUCN/SSC Canid Specialist Group, Gland, 430 p.

SINDING M. S., GOPALAKRISHNAN S., RAMOS-MADRIGAL J., DE MANUEL M., PITULKO V. V., KUDERNA L., FEUERBORN T. R., FRANTZ L. A. F., VIEIRA F. G., NIEMANN J., SAMANIEGO CASTRUITA J. A., CARØE C., ANDERSEN-RANBERG E. U., JORDAN P. D., PAVLOVA E. Y., NIKOLSKIY P. A., KASPAROV A. K., IVANOVA V. V., WILLERSLEV E., SKOGLUND P., FREDHOLM M., WENNERBERG S. E., HEIDE-JØRGENSEN M. P., DIETZ R., SONNE C., MELDGAARD M., DALÉN L., LARSON G., PETERSEN B., SICHERITZ-PONTÉN T., BACHMANN L., WIIG Ø., MARQUES-BONET T., HANSEN A. J. & GILBERT M. T. P. 2020. — Arctic-adapted dogs emerged at the Pleistocene-Holocene transition. *Science* 368:1495-1499. doi: 10.1126/science.aaz8599.

SOLAZZO C., HEALD S., BALLARD M. W., ASHFORD D. A., DEPRIEST P. T., KOESTLER R. J. & COLLINS M. J. 2011. — Proteomics and Coast Salish blankets: a tale of shaggy dogs? *Antiquity* 85 (330): 1418-1432.

STAHL P. W. 1984. — *Tropical Forest Cosmology: the Cultural Context of the Early Valdivia Occupations at Loma Alta (Ecuador).* PhD dissertation, University of Illinois, Urbana-Champaign.

STAHL P. W. 2013. — Early dogs and endemic South American canids of the Spanish Main. *Journal of Anthropological Research* 69 (4): 515-533.

STAHL P. W. 2014. — Perspectival ontology and animal non-domestication in the Amazon Basin, *in* ROSTAIN S. (ed), *Antes de Orellana: Actas del 3er Encuentro Internacional de Arqueología Amazónica.* IFEA, Quito: 221–231.

STEWART O. C. 1942. — Culture Element Distributions: XVIII: Ute-Southern Paiute. *Anthropological Records* 6 (4): 231-356.

SUTTLES W. 1983. — Productivity and its constraints: A Coast Salish case, *Indian Art Traditions of the Northwest Coast.* SFU Archaeology Press, Burnaby: 67-87.

SYKES N. 2014. — *Beastly Questions: Animal Answers to Archaeological Issues.* Bloomsbury Publishing, London, 221 p.

SYKES N., SPRIGGS M. & EVIN A. 2019. — Beyond curse or blessing: the opportunities and challenges of aDNA analysis. *World Archaeology* 51 (4): 503-516. https://doi.org/10.1080/00438243.2019.1741970

TEIT J. 1909. — Two Tahltan Traditions. *The Journal of American Folklore* 22 (85): 314-318.

TEPPER L. H., GEORGE J. & JOSEPH W. 2017. — *Salish Blankets: Robes of Protection and Transformation, Symbols of Wealth.* University of Nebraska Press, Lincoln, 224 p.

THALMANN O., SHAPIRO B., CUI P., SCHUENEMANN V. J., SAWYER S. K., GREENFIELD D. L., GERMONPRÉ M. B., SABLIN M. V., LÓPEZ-GIRÁLDEZ F., DOMINGO-ROURA X., NAPIERALA H., UERPMANN H.-P., LOPONTE D. M., ACOSTA A. A., GIEMSCH L., SCHMITZ R. W., WORTHINGTON B., BUIKSTRA J. E., DRUZHKOVA A., GRAPHODATSKY A. S., OVODOV N. D., WAHLBERG N., FREEDMAN A. H., SCHWEIZER R. M., KOEPFLI K.-P., LEONARD J. A., MEYER M., KRAUSE J., PÄÄBO S., GREEN R. E. & WAYNE R. K. 2013. — Complete mitochondrial genomes of ancient canids suggest a European origin of domestic dogs. *Science* 342 (6160): 871-874. https://doi.org/10.1126/science.1243650

TITO R. Y., BELKNAP III S. L., SOBOLIK K. D., INGRAHAM R. C., CLEELAND L. M. & LEWIS JR C. M. 2011. — DNA from early Holocene American dog. *American Journal of Physical Anthropology* 145 (4): 653-657.

TSCHUDI J. J. 1844-46. — *Untersuchungen über die Fauna Peruana.* Scheitlin & Zollikofer, St. Gallen, 35 p.

UECK M. 1961. — Abstammung und Rassebildung der vorkolumbianischen Haushunde in Südamerika. *Zeitschrift für Säugetierkunde* 26: 157-176.

UHL E. W., KELDERHOUSE C., BUIKSTRA J., BLICK J. P., BOLON B. & HOGAN R. J. 2019. — New world origin of canine distemper: interdisciplinary insights. *International Journal of Paleopathology* 24: 266-278.

URBINA BURGOS R. 2007. — El pueblo chono: de vagabundo y pagano alzado a cristiano y sedentario amestizado, *in* Universidad de Huelva (eds), Orbis incognitvs: avisos y legajos del Nuevo Mundo: homenaje al profesor Luis Navarro García, Huelva, diciembre 2007: 325-346.

VALADEZ AZÚA R., BLANCO PADILLA A., RODRÍGUEZ GALICIA B., VINIEGRA RODRÍGUEZ F. & OLMOS JIMÉNEZ K. 2001. — Una quinta raza de perro prehispánica o ¿una segunda especie de lobo mexicano? *AMMVEPE* 12 (5): 149-159.

VALADEZ AZÚA R., BLANCO PADILLA A., VINIEGRA RODRÍGUEZ F., OLMO JIMÉNEZ K. & RODRIGUEZ GALICIA B. 2000. — El tlalchichi, perro de patas cortas del occidente mesoamericano. *AMMVEPE* 11 (2): 49-57.

VALADEZ AZÚA R., GALICIA B. R., CASTRO R., COWGILL G. & SUGIYAMA S. 2002. — Híbridos de lobos y perros (tercer acto): hallazgos en la Pirámide de Quetzalcóatl de la antigua ciudad de Teotihuacan (segunda y última de dos partes). *AMMVEPE* 13 (6): 219-231.

VALADEZ AZÚA R. & MENDOZA ESPAÑA V. 2005. — El perro como legado cultural. *Revista Nuevos Aportes* 2 (2005): 15-35.

VALADEZ AZÚA R., RODRÍGUEZ GALICIA B., VINIEGRA RODRÍGUEZ F., OLMOS JIMÉNEZ K., BLANCO PADILLA A., TEJEDA VEGA S. & CASAS CASTILLO M. 2002. — Híbridos de lobos y perros en cuevas teotihuacanas. Crónica de un descubrimiento. *AMMVEPE* 13 (1): 6-23.

VALADEZ R., RODRÍGUEZ B., MANZANILLA L. & TEJEDA S. 2006. — Dog-wolf hybrid biotype reconstruction from the archaeological city of Teotihuacan in Prehispanic Central Mexico, *in* SNYDER L. M. & MOORE E. A. (eds), *Dogs and People in Social, Working, Economic or Symbolic Interaction.* Oxford: 121-131.

VAN ASCH B., ZHANG A.-B., OSKARSSON M. C., KLÜTSCH C. F., AMORIM A. & SAVOLAINEN P. 2013. — Pre-Columbian origins of Native American dog breeds, with only limited replacement by European dogs, confirmed by mtDNA analysis. *Proceedings of the Royal Society B: Biological Sciences* 280 (1766): 20131142.

VÁSQUEZ SÁNCHEZ V. F., ROSALES T. E., GÁLVEZ C. & DORADO G. 2016. — El origen del perro (*Canis lupus familiari*s) sin pelo peruano (PSPP): pruebas arqueológicas, zooarqueológicas y genéticas. Revisión. *Archaeobios* 10: 80-102.

VILÀ C., SAVOLAINEN P., MALDONADO J. E., AMORIM I. R., RICE J. E., HONEYCUTT R. L., CRANDALL K. A., LUNDEBERG J. & WAYNE R. K. 1997. — Multiple and ancient origins of the domestic dog. *Science* 276 (5319): 1687-1689.

VILÀ C. & LEONARD J. A. 2012. — Canid Phylogeny and Origin of the Domestic Dog, *in* OSTRANDER E. & RUVINSKY A. (eds), *The Genetics of the Dog.* Oxford: 1-11.

VONHOLDT B. M., POLLINGER J. P., LOHMUELLER K. E., HAN E., PARKER H. G., QUIGNON P., DEGENHARDT J. D., BOYKO A. R., EARL D. A., AUTON A., REYNOLDS A., BRYC K., BRISBIN A., KNOWLES J. C., MOSHER D. S., SPADY T. C., ELKAHLOUN A., GEFFEN E., PILOT M., JEDRZEJEWSKI W., GRECO C., RANDI E., BANNASCH D., WILTON A., SHEARMAN J., MUSIANI M., CARGILL M., JONES P. G., QIAN Z., HUANG W., DING Z.-L., ZHANG Y.-P., BUSTAMANTE C. D., OSTRANDER E. A., NOVEMBRE J. & WAYNE R. K. 2010. — Genome-wide SNP and haplotype analyses reveal a rich history underlying dog domestication. *Nature* 464 (7290): 898-902. https://doi.org/10.1038/nature08837

WALKER D. N. & FRISON G. C. 1982. — Studies on Amerindian dogs, 3: Prehistoric wolf/dog hybrids from the Northwestern Plains. *Journal of Archaeological Science* 9 (2): 125-172.

WALKER R. B., MOREY D. F. & RELETHFORD J. H. 2005. — Early and mid-Holocene dogs in southeastern North America: examples from dust cave. *Southeastern Archaeology* 24: 83-92.

WAYNE R. K., NASH W. G. & O’BRIEN S. J. 1987. — Chromosomal evolution of the Canidae. *Cytogenetic and Genome Research* 44 (2-3): 123-133. https://doi.org/10.1159/000132356

WEISS P. 1970. — El perro peruano sin pelo. *Acta Herediana Lima* 3: 33-45.

WELLS O. 1969. — *Salish Weaving, Primitive and Modern: As Practised by the Salish Indians of South West British Columbia.* Cornell University, Ithaca, 36 p.

WEST C. F. & FRANCE C. A. 2015. — Human and canid dietary relationships: comparative stable isotope analysis from the Kodiak Archipelago, Alaska. *Journal of Ethnobiology* 35 (3): 519-535.

WILSON G. L. 1924. — The horse and the dog in Hidatsa Culture. *Anthropological Papers of the American Museum of Natural History* 15: 125-311.

WING E. S. 1978. — Use of dogs for food: an adaptation to the coastal environment, *in* STARK B. & VOORHES B. (eds), *Prehistoric Coastal Adaptation: The Economy and Ecology of Maritime Middle America.* Academic Press, New York: 29-41.

WING E. S. 1989. — Human use of canids in the central Andes, *in* EISENBERG J. & REDFORD K. (eds), *Advances in Neotropical Mammalogy.* Sandhill Crane Press, Gainesville: 265-278.

WINSHIP G. P. 1896. — The Coronado Expedition, 1540-1542, *14th Annual Report of Bureau of American Ethnology.* US Government Printing Office, Washington D.C.: 339-558.

WINSHIP G. P. 1904. — *The Journey of Coronado 1540-1542.* Barnes and Company, New York, 251 p.

WITT K. E., JUDD K., KITCHEN A., GRIER C., KOHLER T. A., ORTMAN S. G., KEMP B. M. & MALHI R. S. 2015. — DNA analysis of ancient dogs of the Americas: identifying possible founding haplotypes and reconstructing population histories. *Journal of Human Evolution* 79: 105-118.

WORMINGTON H. M. 1947. — *Prehistoric Indians of the Southwest.* Denver Museum of Natural History, Denver, 191 p.

WYLDE M. 2017. — *The Inca Dogs and their Ancestors.* Unpublished PhD dissertation, University of Florida, Gainesville.

YOUNG S. P. & GOLDMAN E. A. 1944. — *The Wolves of North America: Part I. Their History, Life Habits, Economic Status, and Control.* The American Wildlife Institute, Washington D.C., 385 p.

**Fig. 1. - “Canis mexicana", a domestic dog with peculiar humps and apparent muscle hypertrophy, as depicted in Hernández’ (1651).** Previously dismissed as a caricature (Ueck 1961), it may actually illustrate a phenotype associated with mutations in the myostatin gene. Picture retrieved from The Internet Archive, <https://archive.org/details/rerummedicarumno00hern/page/466/mode/1up?q=hump>

**Fig. 2. - Remains of pre-Columbian domestic dogs as reported in the nineteenth century**. Drawings of remains of domestic dogs excavated from the graves of Ancon in Peru, as depicted in Reiss & Stübel (1880-1887; Plates 117 and 118, picture modified to exclude the depiction of a fox-like animal). Left side, mummies, as well as skull with mandible of one mummy, of shepherd-like domestic dogs. Right side, skulls and mandibles of shepherd-like, dachshund-like, and bulldog-like domestic dogs as well as long bones of the forelimb of a dachshund-like domestic dog. Two of these skulls are also depicted in (Fig. 3). Available from the Ibero-Amerikanisches Institut (Preussischer Kulturbesitz), https://digital.iai.spk-berlin.de/viewer/image/1681616637/225/ and https://digital.iai.spk-berlin.de/viewer/image/1681616637/229/ Drawings are not to scale.

**Fig. 3. - Drawings of skulls of pre-Columbian domestic dogs.** These drawings were published as part of Alfred Nehring’s work (1884) and show skulls of domestic dogs that have been excavated in the Inca burial ground of Ancon, Peru. The same skulls are also depicted in (Fig. 2). A, shepherd-like dog in ventral view; B, bulldog-like dog in ventral view; C, same dog as in B but from dorsal view. Drawings are not to scale.

**Fig. 4. - Skulls of pre-Columbian domestic dogs at the Museum für Naturkunde Berlin, Germany.** A, “Inca dog” from Ancon, Peru (Nehring 1884).

B, Pre-columbian dog from Puebla, Mexico, Nehring-Collection. Specimens are without present-day collection numbers. Every skull is depicted in dorsal, ventral, and lateral view (from left to right), where the lateral view of B is mirrored. Skulls are to scale and the scale bar equals 1 cm. Further information of sources and references are in Appendix 2.

**Fig. 5.** - **Photos of selected dog breeds originating in the Americas**. Top and middle panel show dogs from North America; bottom panel shows dogs from South and Central America and Cuba. Photo credits (Shutterstock) are listed in Appendix 3. Top panel from left to right: Alaskan Malamute, Longhaired whippet; American bulldog puppy; American cocker spaniel; three American hairless terriers. Middle panel: Chesapeake Bay retriever; American Akita; Silken Windhound; Siberian Husky; Miniature American shepherd. Bottom panel: young chihuahuas; Xoloitzcuintli, Mexican hairless dog; Peruvian hairless dog; young Bichon Havanese dog; Brazilian Fox-terrier; Argentinian Dogo.

**Fig. 6. - Selection of skulls of dog breeds originating in the Americas** (selection not exhaustive). These dogs demonstrate the great variation in skull shape and body size of modern American breeds, from slender to short snouted and from giant to dwarf sized varieties, including hairless forms with oligodontia. A, Chesapeake Bay Retriever (NMBE 1051681); B, Alaskan Malamute (NMBE 1051387); C, Chihuahua (NMBE 1052001); D, Fila Brasileiro (I.f.H 14005, mirrored); E, Mexican hairless dog (ZMUZH 13754); F, Peruvian hairless dog (NMBE 1062857); G, Boston Terrier (NMBE 1051959); H, Newfoundland (NMBE 1050502). I.f.H, Zoologisches Institut/Populationsgenetik (former Institut für Haustierkunde), Christian-Albrechts-Universität zu Kiel, Germany; NMBE, collection of the Albert-Heim-Foundation at the Naturhistorisches Museum Bern, Switzerland; ZMUZH, Zoologisches Museum der Universität Zürich, Switzerland (Scale bar: 5 cm).

**Fig. 7. -** Cranium of a Salish woolly dog (Specimen #1) excavated in 1977 from the Semiahmoo Spit, WA (45WH17), dated to 420-900 years before present (Montgomery 1979). A, Lateral view; B, Dorsal view; C, Occlusal view (Scale bar: 1 cm).

**Appendix 1**. - American domestic dog breeds in their different group types, are recognized by the International Canine Kennel Club ([www.internationalcaninekennelclub.com](http://www.internationalcaninekennelclub.com), accessed March 2020). By the nineteenth century, dog fanciers began breeding and trading dogs that were “specialized” for both physical and behavioral traits. With the advent of the Kennel Club in 1873, lineages became standardized by appellation, bloodline, appearance, and behavior. Breeds are the result of pre-zygotic selection – the deliberate mating of preferred animals to perpetuate a specific, observable phenotype. Not listed here are landraces, defined as those resulting from post-zygotic selection; that is, the culling or disposal of unwanted dogs with no direct control over the dog’s reproduction (Lord *et al*. 2016).

| **Breed** | **Country of origin** | **Group** |  |
| --- | --- | --- | --- |
| Alapaha Blue Blood Bulldog | United States of America | Pinscher and Schnauzer - Molossoid and Swiss Mountain and Cattledogs |  |
| Alaskan Klee Kai | United States of America | Spitz and primitive types |  |
| Alaskan Malamute | United States of America | Spitz and primitive types |  |
| American Akita | United States of America | Spitz and primitive types |  |
| American Bulldog | United States of America | Pinscher and Schnauzer - Molossoid and Swiss Mountain and Cattledogs |  |
| American Cocker Spaniel | United States of America | Retrievers - Flushing Dogs - Water Dogs |  |
| American English Coonhound | United States of America | Scent hounds and related breeds |  |
| American Eskimo-standard & miniature | United States of America Germany | Spitz and primitive types |  |
| American Foxhound | United States of America | Scent hounds and related breeds |  |
| American Hairless Terrier | United States of America | Terriers |  |
| American Staffordshire Terrier | United States of America | Terriers |  |
| American Water Spaniel | United States of America | Retrievers - Flushing Dogs - Water Dogs |  |
| Australian Shepherd | United States of America | Sheepdogs and Cattledogs (except Swiss Cattledogs) |  |
| Black and Tan Coonhound | United States of America | Scent hounds and related breeds |  |
| Bluetick Coonhound | United States of America | Scent hounds and related breeds |  |
| Boston Terrier | United States of America | Companion and Toy Dogs |  |
| Boykin Spaniel | United States of America | Retrievers - Flushing Dogs - Water Dogs |  |
| Brazilian Terrier | Brazil | Terriers |  |
| Canadian Eskimo Dog | Canada | Spitz and primitive types |  |
| Chesapeake Bay Retriever | United States of America | Retrievers - Flushing Dogs - Water Dogs |  |
| Chihuahua | Mexico | Companion and Toy Dogs |  |
| Cimarrón Uruguayo | Uruguay | Pinscher and Schnauzer - Molossoid and Swiss Mountain and Cattledogs |  |
| Dogo Argentino | Argentina | Pinscher and Schnauzer - Molossoid and Swiss Mountain and Cattledogs |  |
| Fila Brasileiro | Brazil | Pinscher and Schnauzer - Molossoid and Swiss Mountain and Cattledogs |  |
| Havanese | Cuba | Companion and Toy Dogs |  |
| Labrador Retriever | Canada | Retrievers - Flushing Dogs - Water Dogs |  |
| Longhaired Whippet | United States of America | Sighthounds |  |
| Lousiana Catahoula Leopard Dog | United States of America | Sheepdogs and Cattledogs (except Swiss Cattledogs) |  |
| Miniature American Shepherd | United States of America | Sheepdogs and Cattledogs (except Swiss Cattledogs) |  |
| Newfoundland | Canada | Pinscher and Schnauzer - Molossoid and Swiss Mountain and Cattledogs |  |
| Nova Scotia Duck Tolling Retriever | Canada | Retrievers - Flushing Dogs - Water Dogs |  |
| Olde Victorian Bulldogge | United States of America | Pinscher and Schnauzer - Molossoid and Swiss Mountain and Cattledogs |  |
| Peruvian Hairless Dog | Peru | Spitz and primitive types |  |
| Redbone Coonhound | United States of America | Scent hounds and related breeds |  |
| Shiloh Shepherd | United States of America | Sheepdogs and Cattledogs (except Swiss Cattledogs) |  |
| Siberian Husky | United States of America | Spitz and primitive types |  |
| Silken Windhound | United States of America | Sighthounds |  |
| Treeing Tennessee Brindle Coonhound | United States of America | Scent hounds and related breeds |  |
| Treeing Walker Coonhound | United States of America | Scent hounds and related breeds |  |
| Xoloitzcuintle | Mexico | Spitz and primitive types |  |

**Appendix 2. Information related to skulls of pre-Columbian domestic dogs at the Museum für Naturkunde Berlin, Germany.**

The following designations refer to the Fig. 4 of the main text. A, «Zm 355» is housed in the Nehring-Collection (Zoologische Sammlung der Königlichen Landwirtschaftlichen Hochschule zu Berlin) and described as “Inca dog from Ancon, 1889” (as noted in the collection catalogue (1886) and as written on the actual specimen). This specimen most likely does not belong to the collection described by Nehring (1884, see Fig. 3) and Reiss & Stübel (1880-1887, see Fig. 1), which also originated from the graves in Ancon, Peru, but which are assumed to have been destroyed in the World Wars (Ueck 1961).

B, “7031” and C, “7013” are also housed in the Nehring-Collection, but have been found by Prof. Seler in Berlin (as described in the collection files). In contrast to A, these apparently unpublished remains are described as “from an old grave in the district Chalchicomula, close to Jalapazco, Puebla Mexico”. Further, both skulls are described as to be “surely from a time before the conquest of Mexico”

**Appendix 3: Credits to photographs in Fig. 5 of selected dog breeds originating in the Americas**. All photo images are from Shutterstock, photo credit is indicated in parenthesis. Top panel from left to right: Alaskan Malamute, 19 months old (Eric Isselee); Longhaired whippet (MirasWonderland); American bulldog puppy 5 months old (Erik Lam); American cocker spaniel standing with reflection on white background - 3 years old (WilleeCole Photography); three American hairless terriers (Dora Zett). Middle panel: Chesapeake Bay retriever (Erik Lam); American Akita (Jagodka); Silken Windhound (Erik Lam); Siberian Husky 4 years old (Eric Isselee); Miniature American shepherd (MirasWonderland). Bottom panel: young chihuahuas (cynoclub); Xoloitzcuintli, Mexican hairless dog (Masarik); Peruvian hairless dog 1 year old (Rosa Jay); young Bichon Havanese dog (Dorottya Mathe); Brazilian Fox-terrier (venturinirica); Argentinian Dogo (GeptaYs).
